# Supplementary material
Source: publisher site journal article supplement (https://www.dovepress.com/get_supplementary_file.php?f=327945.docx)
Supplement: Supplementary file 1 [file get_supplementary_file.php]

**Supplementary Table 1** Between-group difference in causal flow from the left hippocampus to other regions

| **Brain region** | **Hemi** | **Voxel** | **MNI coordinate (x, y, z)** | **Peak T score** |
| --- | --- | --- | --- | --- |
| **EM VS HC** |  | | | |
| NA |  |  |  |  |
| **CM VS HC** |  |  |  |  |
| mPFC | L/R | 154 | 6,51,21 | 3.6 |
| **CM VS EM** |  |  |  |  |
| mPFC | L/R | 267 | 6,54,21 | 5.26 |

**Abbreviations:** EM, the episodic migraine group; CM, the chronic migraine group; HC, the healthy control group; Hemi, hemisphere; L, left; R, right; MNI, Montreal Neurological Institute; mPFC, medial prefrontal cortex; NA, not applicable.

**Supplementary Table 2** Between-group difference in causal flow from the right hippocampus to other regions

| **Brain region** | **Hemi** | **Voxel** | **MNI coordinate (x, y, z)** | **Peak T score** |
| --- | --- | --- | --- | --- |
| **EM VS HC** |  | | | |
| NA |  |  |  |  |
| **CM VS HC** |  |  |  |  |
| Insula/putamen | R | 64 | 39,-12,,-3 | 4.15 |
| Cerebellum | L/R | 51 | -18,-63,-24 | -4.08 |
| **CM VS EM** |  |  |  |  |
| Insula/putamen | R | 56 | 33,-6,-6 | 3.72 |
| Cerebellum | L/R | 90 | -18,-63,-24 | -3.91 |

**Abbreviations:** EM, the episodic migraine group; CM, the chronic migraine group; HC, the healthy control group; Hemi, hemisphere; L, left; R, right; MNI, Montreal Neurological Institute; NA, not applicable.

**Supplementary Table 3** Between-group difference in causal flow from other regions to the left hippocampus

| **Brain region** | **Hemi** | **Voxel** | **MNI coordinate (x, y, z)** | **Peak T score** |
| --- | --- | --- | --- | --- |
| **EM VS HC** |  | | | |
| Visual areas | L | 207 | -24,-78,21 | -4.02 |
| Visual areas | R | 64 | 21,-54,9 | -4.42 |
| MFG/SFG | R | 67 | 27,54,18 | 4.34 |
| **CM VS HC** |  |  |  |  |
| Visual areas | L | 287 | -15,-81,3 | -4.22 |
| Visual areas | R | 128 | 18,-51,12 | -4.55 |
| MFG/SFG | R | 26 | 42,48,27 | 3.37 |
| **CM VS EM** |  |  |  |  |
| NA |  |  |  |  |

**Abbreviations:** EM, the episodic migraine group; CM, the chronic migraine group; HC, the healthy control group; Hemi, hemisphere; L, left; R, right; MNI, Montreal Neurological Institute; MFG, middle frontal gyrus; SFG, superior frontal gyrus; NA, not applicable.

**Supplementary Table 4** Between-group difference in causal flow from other regions to the right hippocampus

| **Brain region** | **Hemi** | **Voxel** | **MNI coordinate (x, y, z)** | **Peak T score** |
| --- | --- | --- | --- | --- |
| **EM VS HC** |  | | | |
| Visual areas | L | 109 | -21,-81,27 | -4.02 |
| Visual areas | R | 25 | 15,-84,-9 | -4.07 |
| **CM VS HC** |  |  |  |  |
| Visual areas | L | 101 | -15,-78,3 | -4.3 |
| Visual areas | R | 51 | 12,-90,-3 | -4.12 |
| **CM VS EM** |  |  |  |  |
| NA |  |  |  |  |

**Abbreviations:** EM, the episodic migraine group; CM, the chronic migraine group; HC, the healthy control group; Hemi, hemisphere; L, left; R, right; MNI, Montreal Neurological Institute; NA, not applicable.
